# Supplementary material for: Regulation of Arabidopsis photoreceptor CRY2 by two distinct E3 ubiquitin ligases
Source: PubMed Central journal article supplement (PMC8042123; doi:10.1038/s41467-021-22410-x), 2021-04-12
Supplement: 41467_2021_22410_MOESM1_ESM.pdf [file 41467_2021_22410_MOESM1_ESM.pdf]

## Supplementary information

### Regulation of *Arabidopsis* photoreceptor CRY2 by two distinct E3 ubiquitin ligases

#### Contents

**Supplementary Fig. 1** Flowering phenotype analysis of *cry1cry2lrb123* quintuple mutant plants. (for Figure 1)

**Supplementary Fig. 2** Rescue of the blue-light hypersensitivity phenotype of *lrb123* by LRB2. (for Figure 1)

**Supplementary Fig. 3** CRY2<sup>P532L</sup> plant is insensitive to blue light. (for Figure 6)

**Supplementary Fig. 4** Maps of HEK293T vectors used in this study.

**Supplementary Fig. 5** Maps of plant binary vectors used in this study.

**Supplementary Table 1** CRY2-IP mass-spectrometric results showing the blue light-dependent association of CRY2/LRB1 and CRY2/LRB2 in *Arabidopsis*. (for Figure 3 and Figure 4)

**Supplementary Table 2** Primers used in this study

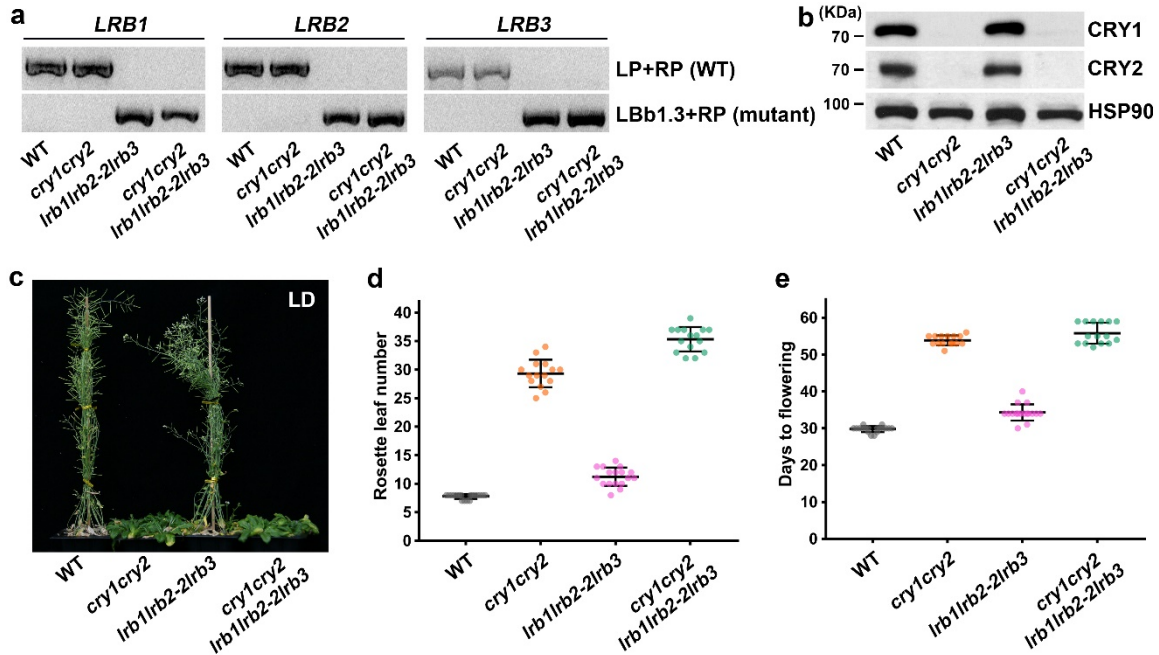

**Supplementary Fig. 1 Flowering phenotype analysis of *cry1cry2lrb123* quintuple mutant plants.** **a** PCR confirmation of T-DNA insertion at *LRB1*, *LRB2*, *LRB3* in *cry1cry2lrb123*. LP and RP primer pairs amplified the genomic DNA fragment of *LRB1*, *LRB2*, or *LRB3*. Lb1.3 and RP primers pair amplified the T-DNA insertion of *LRB1*, *LRB2*, or *LRB3*. **b** Immunoblots confirmation of the absence of CRY1 and CRY2 proteins in *cry1cry2lrb123*. Proteins isolated from indicated genotypes were analyzed with anti-CRY1 antibody, anti-CRY2 antibody or anti-HSP90 antibody. HSP90 is used as a loading control. **c** Representative images showing the flowering phenotypes of indicated plants grown in LD (16h light / 8h dark) for 54 days. **d-e** Quantitative analysis of rosette leaf number (**d**) or days to flowering (**e**) of indicated genotypes in LD condition. Data were shown as mean  $\pm$  SD. The above experiments were repeated at least twice with similar results.

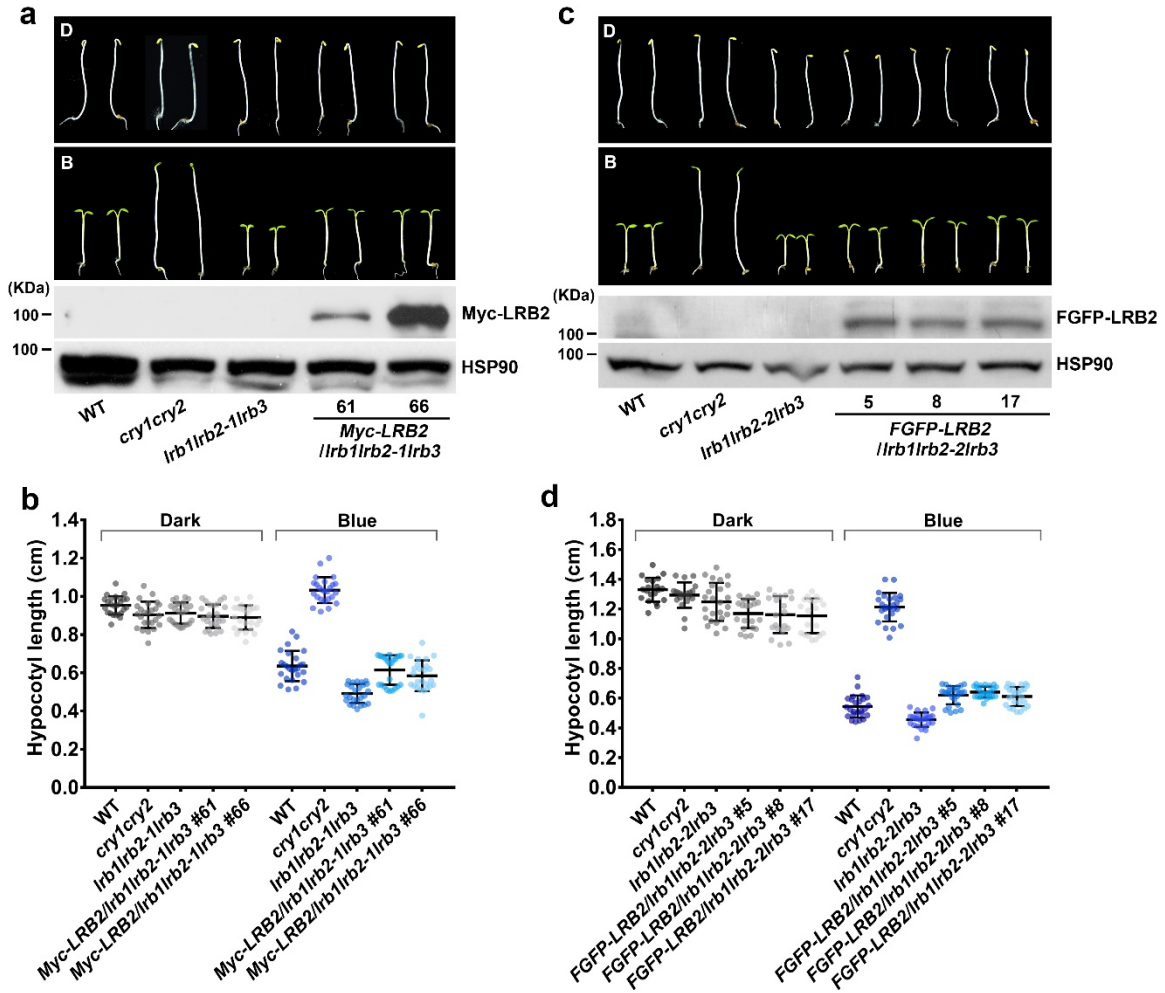

**Supplementary Fig. 2 Rescue of the blue-light hypersensitivity phenotype of *lrb123* by LRB2.** **a, c**, Seedlings were grown in darkness (D) or blue light (B,  $5 \mu\text{mol m}^{-2} \text{s}^{-1}$ ) for 6 days. Immunoblots showing the expression of Myc-LRB2 (**a**) and FGFP-LRB2 (**c**) in seedlings, were probed with anti-Myc, anti-Flag, or anti-HSP90 antibodies. HSP90 is used as a loading control. **b, d**, Measurements of hypocotyl length of seedlings shown in (**a**) or (**c**). Data were shown as mean  $\pm$  SD. The above experiments were repeated at least three times with similar results.

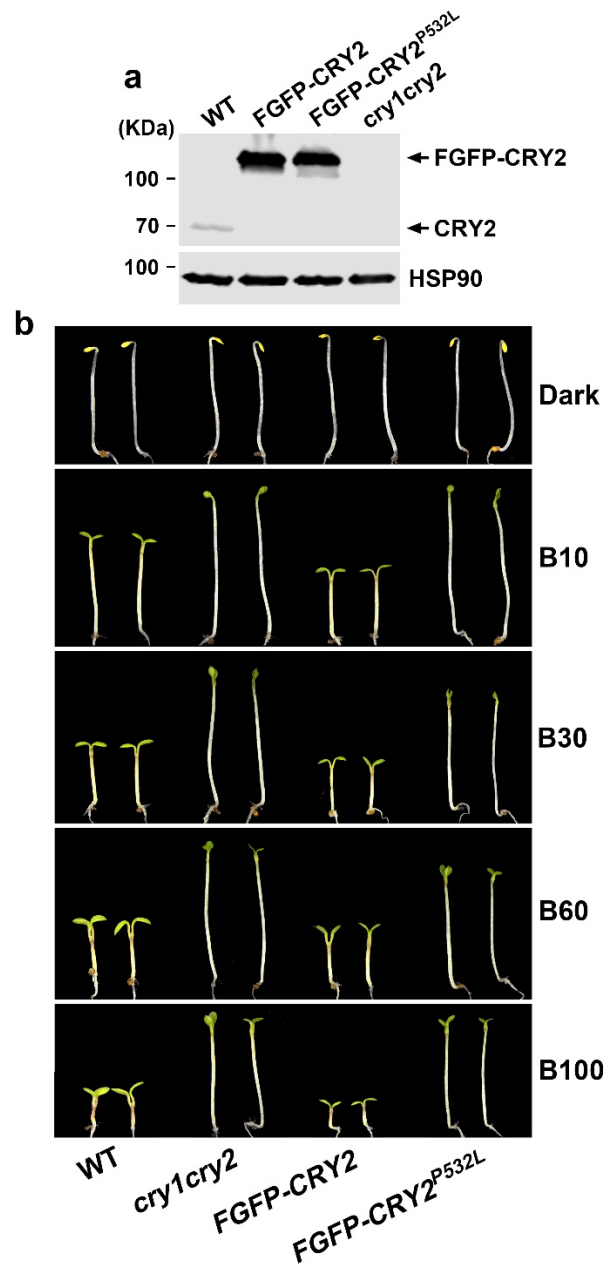

**Supplementary Fig. 3 CRY2<sup>P532L</sup> plant is insensitive to blue light.** **a**, Proteins of 7-day-old seedlings were analyzed by immunoblots probed with anti-CRY2 antibody or anti-HSP90 antibody. HSP90 is used as a loading control. **b**, 6-day-old seedlings grown under different intensities of blue light (0, 10, 30, 60, 100  $\mu\text{mol m}^{-2} \text{s}^{-1}$ ). *FGFP-CRY2*, constitutively overexpressing FGFP-CRY2 in *cry1cry2rdr6*; *FGFP-CRY2<sup>P532L</sup>*, constitutively overexpressing FGFP-CRY2<sup>P532L</sup> in *cry1cry2rdr6*. The above experiments were repeated at least three times with similar results.

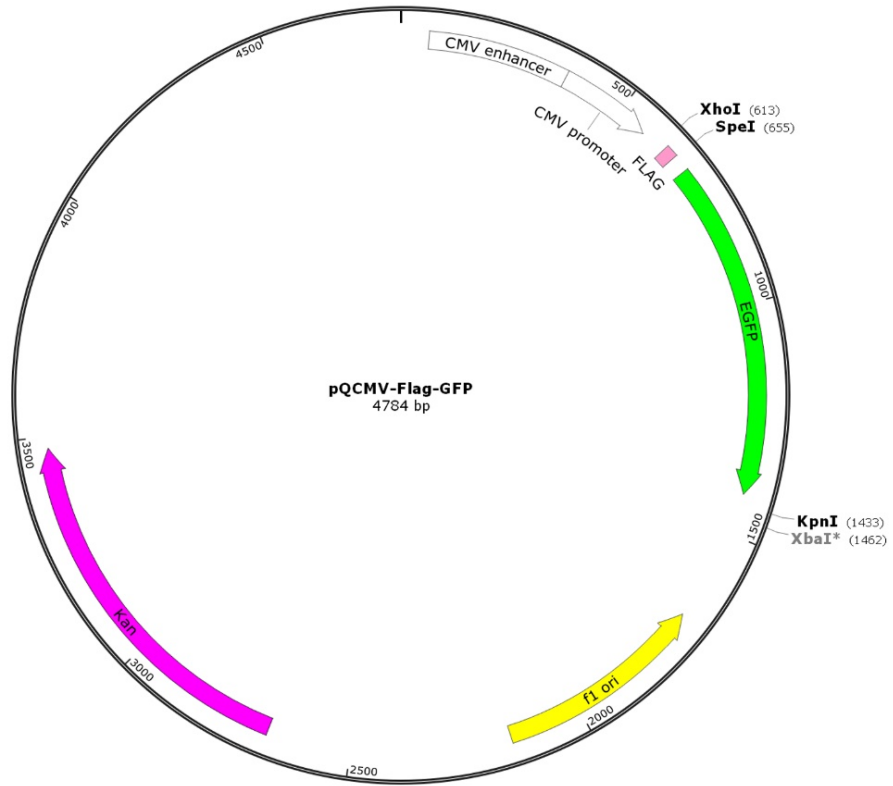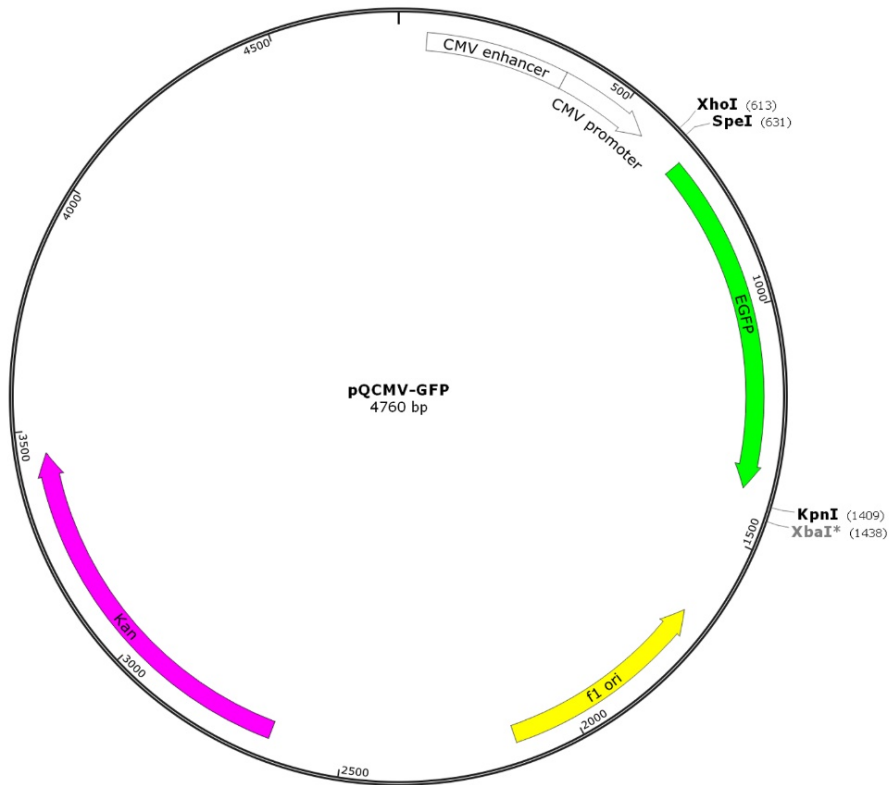

Supplementary Fig. 4 Maps of HEK293T vectors used in this study.

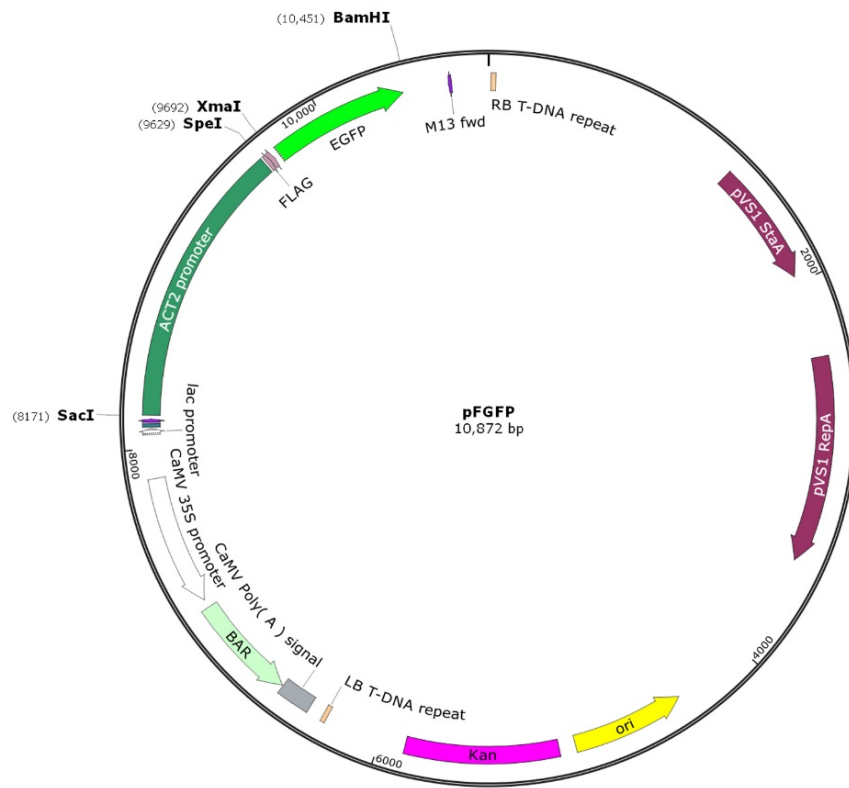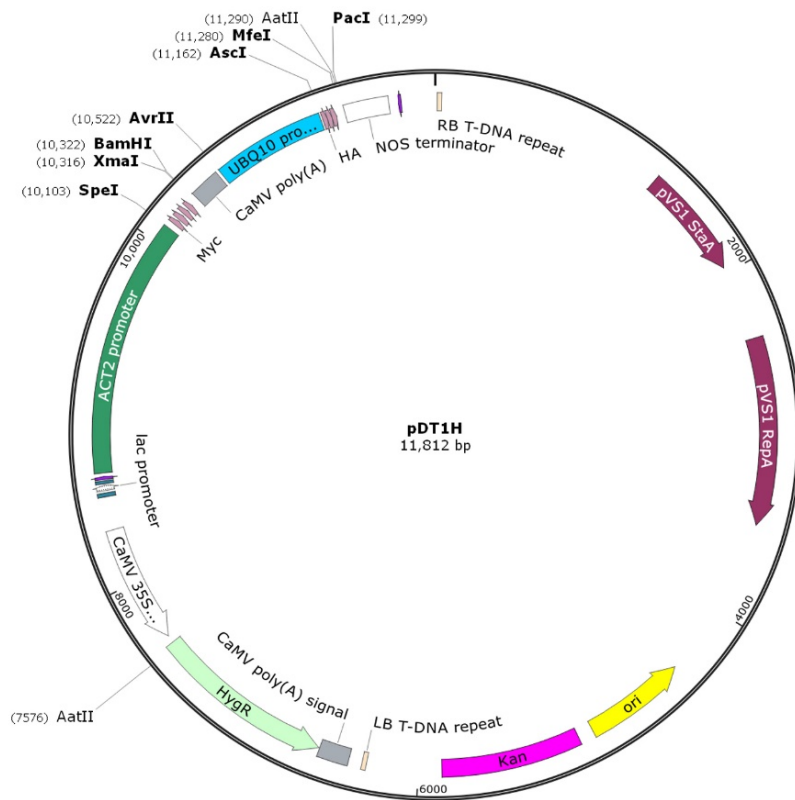

**Supplementary Fig. 5 Maps of plant binary vectors used in this study.**

**Supplementary Table 1**

| Locus ID          | Dark           |                    |                |              | Blue           |                    |                |              |
|-------------------|----------------|--------------------|----------------|--------------|----------------|--------------------|----------------|--------------|
|                   | Spectrum Count | NSAF <sub>e5</sub> | Sequence Count | Coverage (%) | Spectrum Count | NSAF <sub>e5</sub> | Sequence Count | Coverage (%) |
| CRY2              | 1423           | 23707.522          | 162            | 90.8         | 1371           | 14316.19           | 163            | 85.8         |
| AT3G61600.1(LRB2) | 0              | 0                  | 0              | 0            | 10             | 113.91439          | 9              | 21           |
| AT2G46260.1(LRB1) | 0              | 0                  | 0              | 0            | 3              | 34.174316          | 3              | 7            |

**Supplementary Table 1 CRY2-IP mass-spectrometric results showing the blue light-dependent association of CRY2/LRB1 and CRY2/LRB2 in *Arabidopsis*.** Dark-grown seedlings constitutively expressing *GFP-CRY2* were kept in the dark or irradiated with 30  $\mu\text{mol m}^{-2} \text{s}^{-1}$  blue light for 10, 20 and 30 minutes before protein extraction. Proteins were immunoprecipitated by GFP-trap beads, precipitated, digested with trypsin and then subjected to mass-spectrometric analysis.

## Supplementary Table 2. Primers used in this study

### Primers for constructs used for expressing recombinant proteins in HEK293T Cells

| Primer name | Primers                                                                                                |
|-------------|--------------------------------------------------------------------------------------------------------|
| Flag-CRY2-F | CGACAAGGCTACTAGTATGAAGATGGACAAAAAGA<br>CTATAGTT                                                        |
| Flag-CRY2-R | TAAGCGTGCTCAGCGGTACCTCATTGCAACCATTT<br>TTTCC                                                           |
| Flag-LRB1-F | CGACAAGGCTACTAGTATGAGAGGTTCCAATAACAC<br>CGA                                                            |
| Flag-LRB1-R | TAAGCGTGCTCAGCGGTACCTCAGTGCAGGTCTGAG<br>GAAC                                                           |
| Flag-LRB2-F | CGACAAGGCTACTAGTATGAGAGGTACTACTGAGAA<br>TACGG                                                          |
| Flag-LRB2-R | TAAGCGTGCTCAGCGGTACCCTAAGGATCTGTAGAC<br>CTTTTGATGG                                                     |
| Myc-CRY2-F  | GGAGGACCTGGGATCCATGAAGATGGACAAAAAGAC<br>TATAGTT                                                        |
| Myc-CRY2-R  | TAGCAGGCCTGGATCCTCATTGCAACCATTTTTTCC                                                                   |
| Myc-LRB2-F  | GGAGGACCTGGGATCCATGAGAGGTACTACTGAGAA<br>TACGG                                                          |
| Myc-LRB2-R  | TAGCAGGCCTGGATCCCTAAGGATCTGTAGACCTTTT<br>GATGG                                                         |
| Myc-COP1-F  | GGAGGACCTGGGATCCATGGAAGAGATTTGACGGGA<br>TCC                                                            |
| Myc-COP1-R  | TAGCAGGCCTGGATCCTCACGCAGCGAGTACCAGAA<br>CT                                                             |
| Myc-SPA1-F  | GGAGGACCTGGGATCCATGCCTGTTATGGAAAGAGT<br>AGC                                                            |
| Myc-SPA1-R  | TAGCAGGCCTGGATCCTCAAACAAGTTTTAGTAGCTT<br>CATG                                                          |
| HA-PPK1-F   | CACCATGGCTACTAGTTACCCGTATGATGTTCCGGAT<br>TACGCAGGTTACCCGTATGATGTTCCGGATTACGCAG<br>GTATGCCTGAGCTGCGTAGC |
| HA-PPK1-R   | TAAGCGTGCTCAGCGGTACCTCAAGATACAGTTCGGC<br>CATAG                                                         |



**Primers for constructs used for BiFC assays**

| <b>Primer name</b> | <b>Primers</b>                                                 |
|--------------------|----------------------------------------------------------------|
| pDONR-CRY2-F       | GGGGACAAGTTTGTACAAAAAAGCAGGCTTCATGA<br>AGATGGACAAAAAGACTATAGTT |
| pDONR-CRY2-R       | GGGGACCACTTTGTACAAGAAAGCTGGGTCTTTGC<br>AACCATTTTTTCCCA         |
| pDONR-LRB1-F       | GGGGACAAGTTTGTACAAAAAAGCAGGCTTCATGA<br>GAGGTTCCAATAACACCGA     |
| pDONR-LRB1-R       | GGGGACCACTTTGTACAAGAAAGCTGGGTCTGTGCA<br>GGTCTGAGGAACG          |
| pDONR-LRB2-F       | GGGGACAAGTTTGTACAAAAAAGCAGGCTTCATGAG<br>AGGTACTACTGAGAATACGG   |
| pDONR-LRB2-R       | GGGGACCACTTTGTACAAGAAAGCTGGGTCTCAGGATC<br>TGTAGACCTTTTGATGG    |

**Primers for constructs used for Split-LUC assays**

| <b>Primer name</b>           | <b>Primers</b>                                           |
|------------------------------|----------------------------------------------------------|
| LRB1 $\Delta$ BTB-nLUC-1F    | CGGGGGACGAGCTCGGTACCATGAGAGGTT<br>CCAATAACACCGAT         |
| LRB1 $\Delta$ BTB-nLUC-426R  | ACCCAGTTTGGCTCACTAGAT                                    |
| LRB1 $\Delta$ BTB-nLUC-637F  | AAGTGGGGTATTGATGCACCCGCTTTATTAG<br>ATGTTCTTATG           |
| LRB1 $\Delta$ BTB-nLUC-1683R | ACGAGATCTGGTTCGACGTGCAGGTCTGAGG<br>AACGT                 |
| LRB2 $\Delta$ BTB-nLUC-1F    | CGGGGGACGAGCTCGGTACCATGAGAGGTA<br>CTACTGAGAATACGGATC     |
| LRB2 $\Delta$ BTB-nLUC-432R  | TCCCAGTTTGGCTCACTAG                                      |
| LRB2 $\Delta$ BTB-nLUC-751F  | GAGCCAACTGGGGAGCCCTGCTCTATCTCG<br>AGCT                   |
| LRB2 $\Delta$ BTB-nLUC-1683R | ACGAGATCTGGTTCGACAGGATCTGTAGACCT<br>TTTGATGGTA           |
| cLUC-CRY2-1F                 | ACGCGTCCCAGGGGCGGTACCATGAAGATGG<br>ACAAAAAGACTATAGTTTGGT |
| cLUC-CRY2-1839R              | AGCTCTGCAGGTGCACTCATTGCAACCATT<br>TTTTCCCAAACCTT         |

### Primers for constructs used for plant transformation

| Primer name | Primers                                                      |
|-------------|--------------------------------------------------------------|
| FGFP-CRY2-F | TCCAGCTCCAGGATCCATGAAGATGGACAAAAAGAC<br>TATAGTT              |
| FGFP-CRY2-R | GAGAAAGCTTGGATCCTCATTGCAACCATTTTTTCC                         |
| FGFP-LRB2-F | TCCAGCTCCAGGATCCATGAGAGGTACTACTGAGAA<br>TACGG                |
| FGFP-LRB2-R | GAGAAAGCTTGGATCCCTAAGGATCTGTAGACCTTTT<br>GATGG               |
| Myc-LRB1-F  | CACCCCCGGGGGATCCCCAGCTCCAGCTCCAATGAG<br>AGGTTCCAATAACACCGA   |
| Myc-LRB1-R  | GAGAAAGCTTGGATCCTCAGTGCAGGTCTGAGGAACG<br>T                   |
| Myc-LRB2-F  | CACCCCCGGGGGATCCCCAGCTCCAGCTCCAATGAG<br>AGGTACTACTGAGAATACGG |
| Myc-LRB2-R  | GAGAAAGCTTGGATCCCTAAGGATCTGTAGACCTTTTG<br>ATG                |
| Myc-COP1-F  | CACCCCCGGGGGATCCCCAGCTCCAGCTCCAATGGA<br>AGAGATTTTCGACGGATCC  |
| Myc-COP1-R  | GAGAAAGCTTGGATCCTCACGCAGCGAGTACCAGAACT                       |
| proLRB1-F   | ATGATTACGAATTCGAGCTCTCTTAATTAGTCTCTGTTCT<br>TCAAACTTG        |
| proLRB1-R   | TGTAGTCCATACTAGTCCTCCTTTTCGAAAACCCTCTTC                      |
| proLRB2-F   | ATGATTACGAATTCGAGCTCATAAAATGAGGCCAGAT<br>ACTTTTATTTG         |
| proLRB2-R   | TGTAGTCCATACTAGTCACCTTCCTTCAATTAATTTCT<br>AAGC               |

### Primers for genotyping

| Primer name | Primers                |
|-------------|------------------------|
| LBb1.3      | ATTTTGCCGATTTTCGGAAC   |
| LRB1-LP     | TGGCATTAAACGAACCTCTTTG |
| LRB1-RP     | GCGAGATGAACAAGAGCAAAC  |
| LRB2-1-LP   | CTGAACAGCTTTGGCCATTAG  |
| LRB2-1-RP   | TTCACTCGTCATGGTTCTTCC  |
| LRB2-2-LP   | CCAAAGCCAAAAGAGTAAGGG  |

|            |                           |
|------------|---------------------------|
| LRB2-2-RP  | TCAAGAGCACATGAGATGGTG     |
| LRB3-LP    | AAAAGCGCAAAAACCCTAAAC     |
| LRB3-RP    | CATTTGTTTTTGCTCCGACTC     |
| COP1-1F    | ATGGAAGAGATTTGACGGATC     |
| COP1-1327R | CTTCATAATCACTGCTTGCTATGTG |
